# Supplementary material for: Biosynthesis and Characterization of Silver Nanoparticles Using Microbes and Remediation of Dyes
Source: Research Square preprint supplement (doi:10.21203/rs.3.rs-7728875/v1), 2025-11-13
Supplement: Supplementary file 1 [file 6d1eb467815359b52400bf7d.docx]

**SUPPLEMENTARY INFORMATION**

**d)**

**c)**

**b)**

**a)**


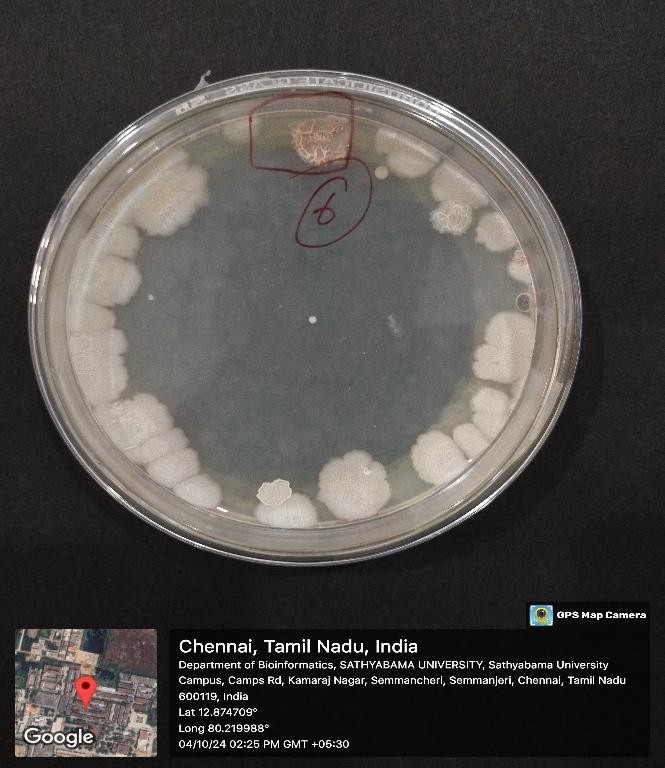

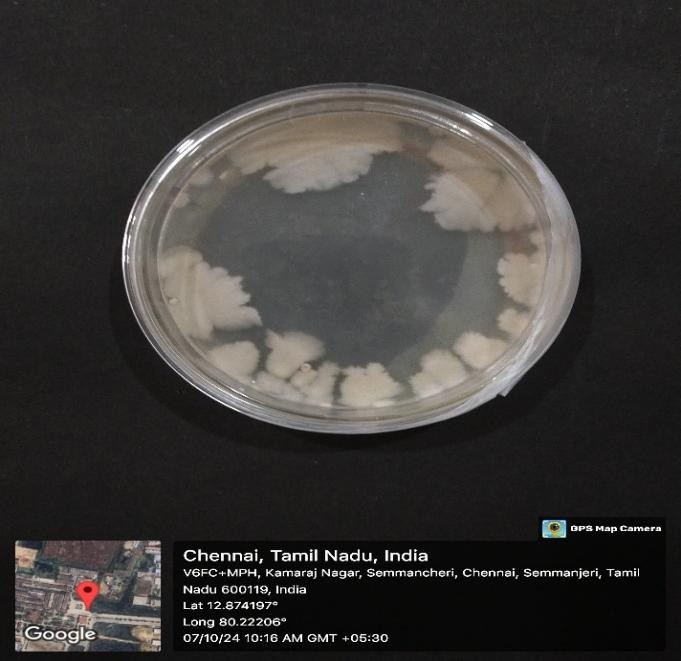

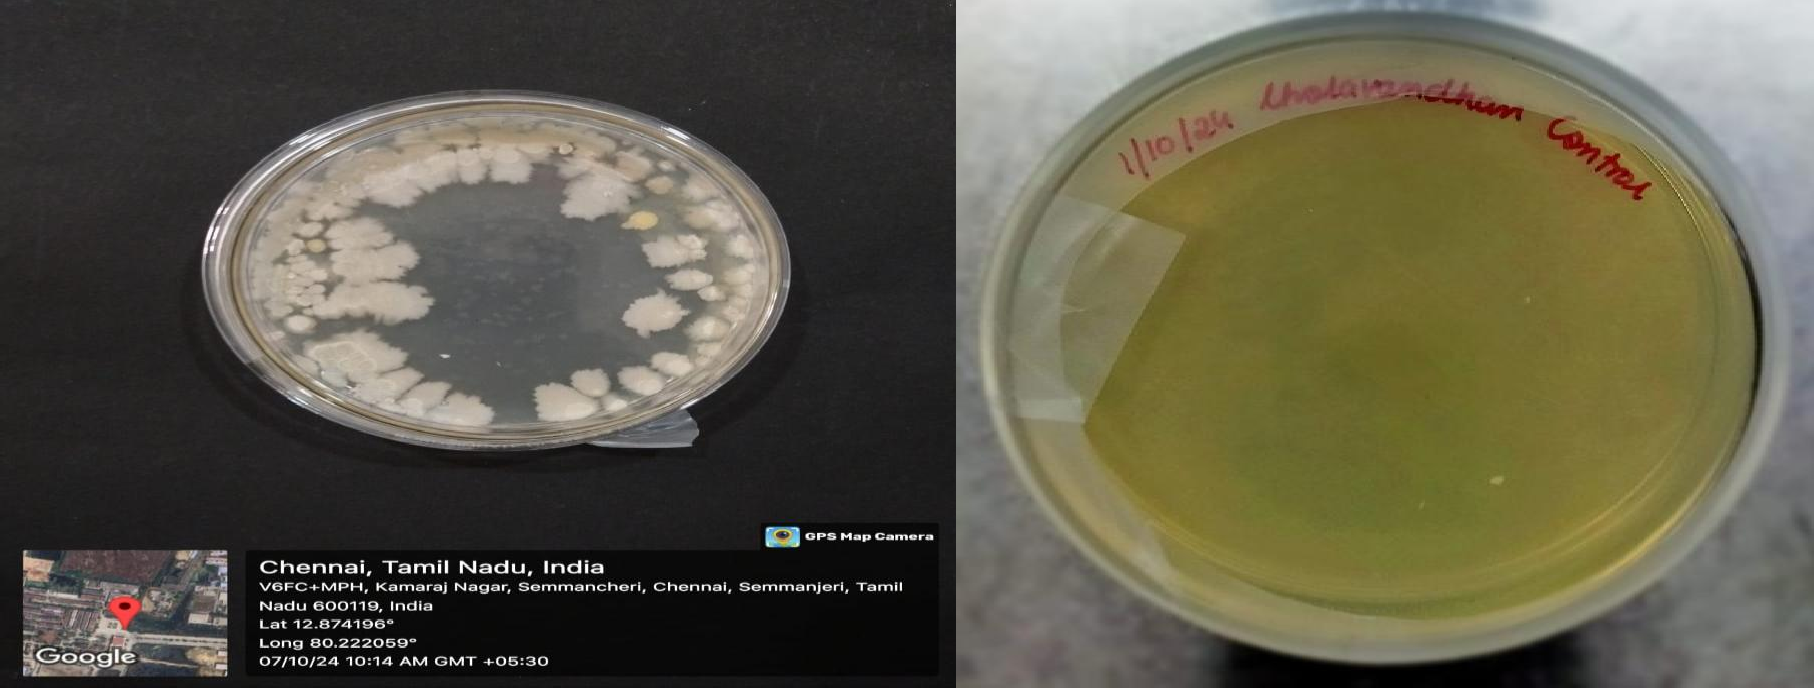

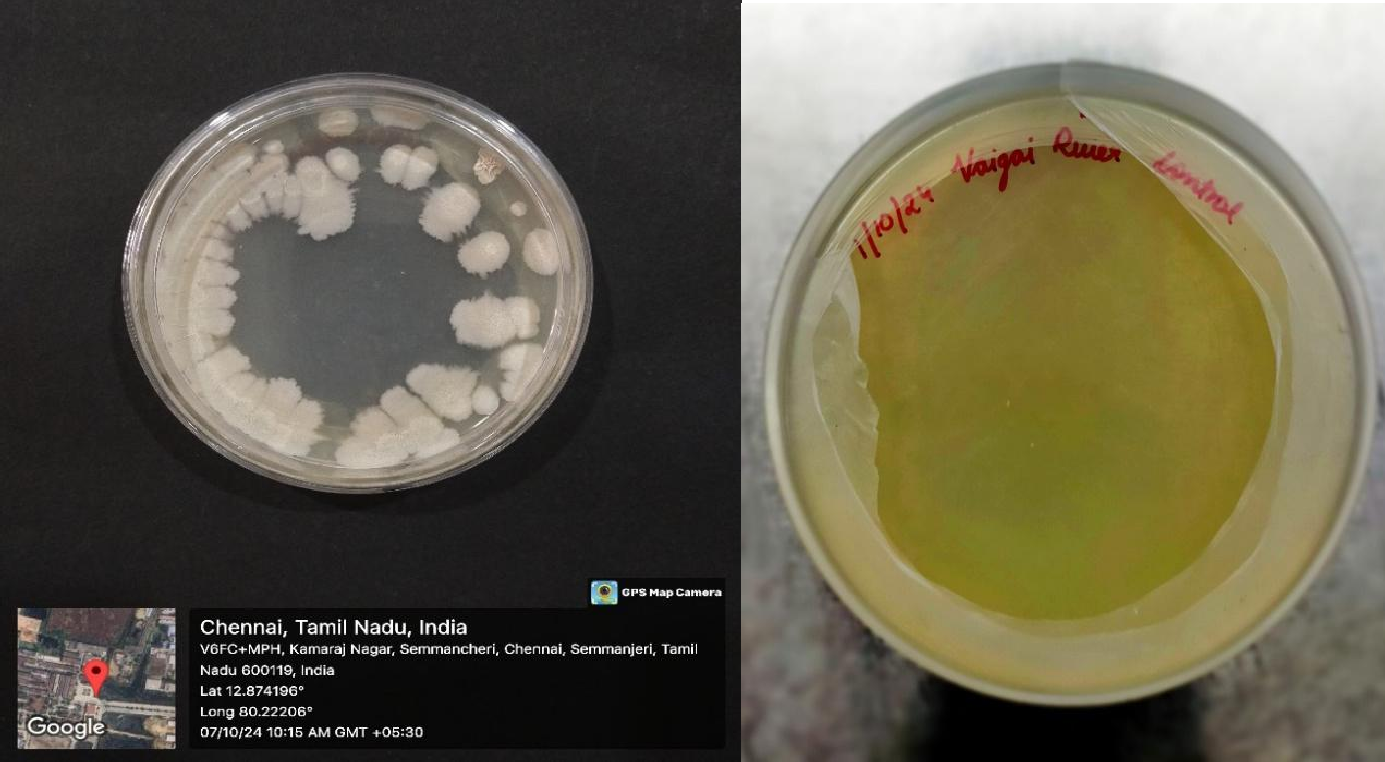


**Fig. 1** Bacterial colonies isolated from four different water samples using the spread plate method a) Mudalaikulam b) Mudalaikulam 2 c) Vaigai River d) Sholavandhan


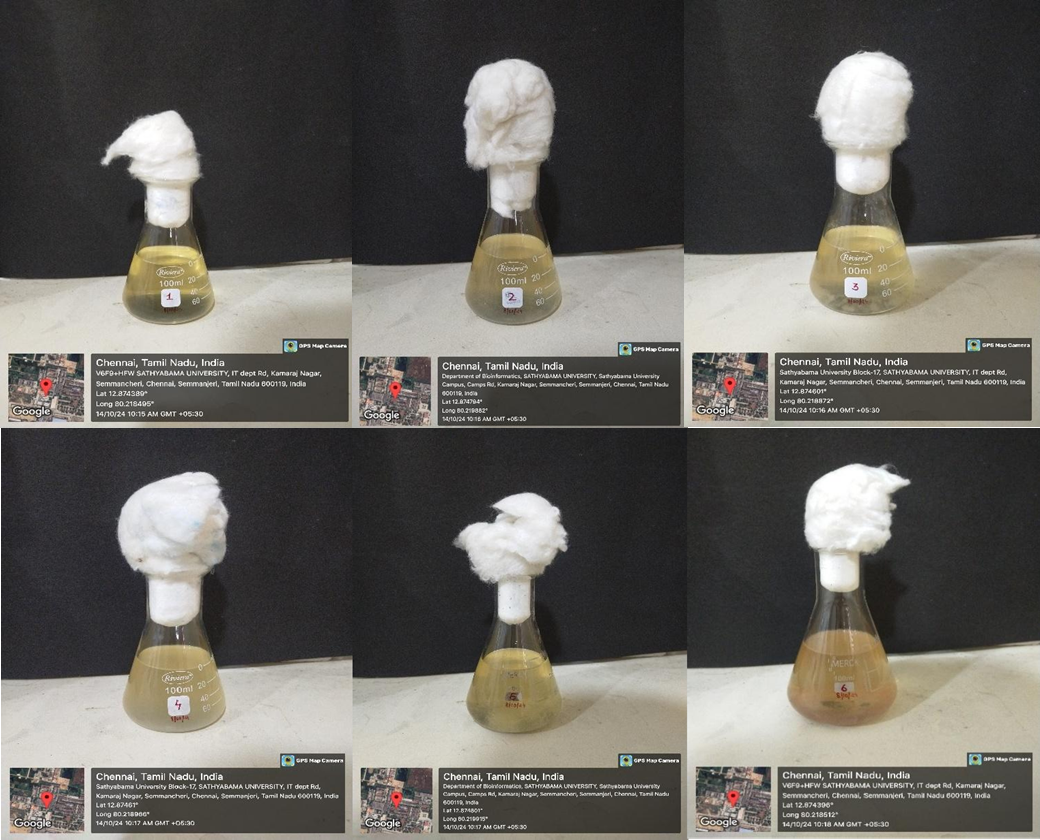


**Fig. 2** Nutrient Broth culture for the streak isolates a) Streak 1 b) Streak 2 c) Streak 3 d) Streak 4 e) Streak 5 f) Streak 6


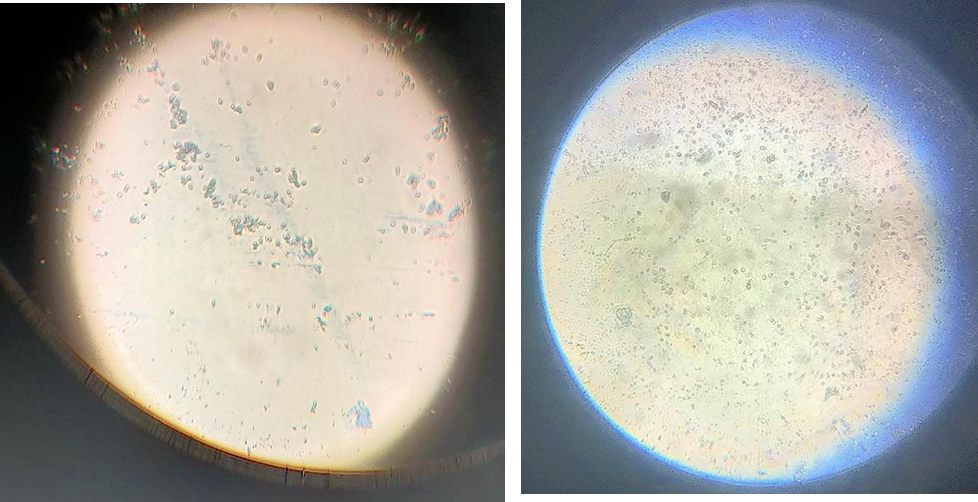


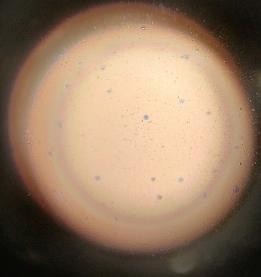

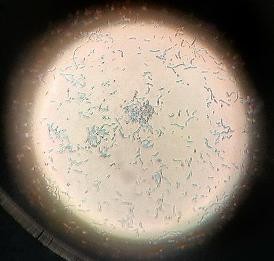
a) b)

**f)**

**e)**

**c)**

**b)**

**a)**


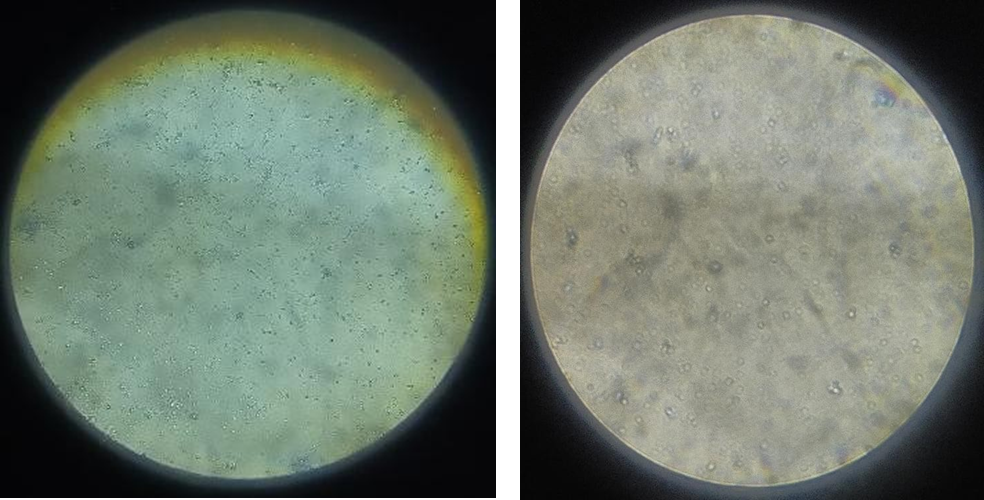
c) d)

e) f)

**Fig.3** Simple Staining of streak isolates a) Streak 1 b) Streak 2 c) Streak 3 d) Streak 4 e) Streak 5 f) Streak 6

**
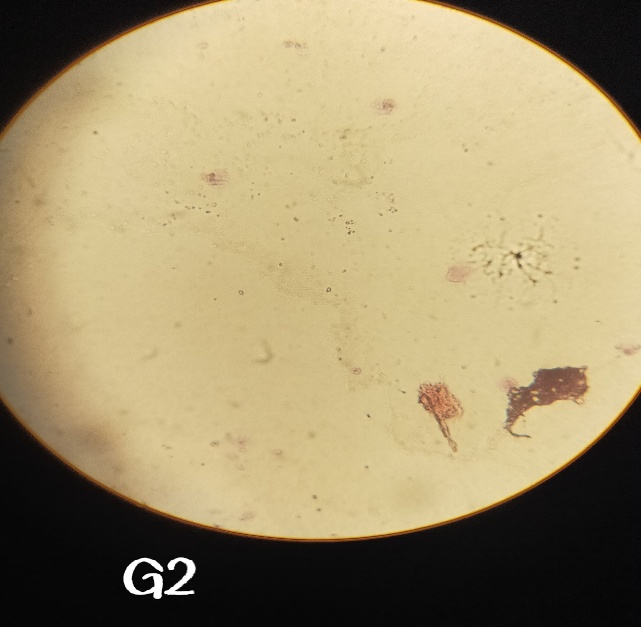

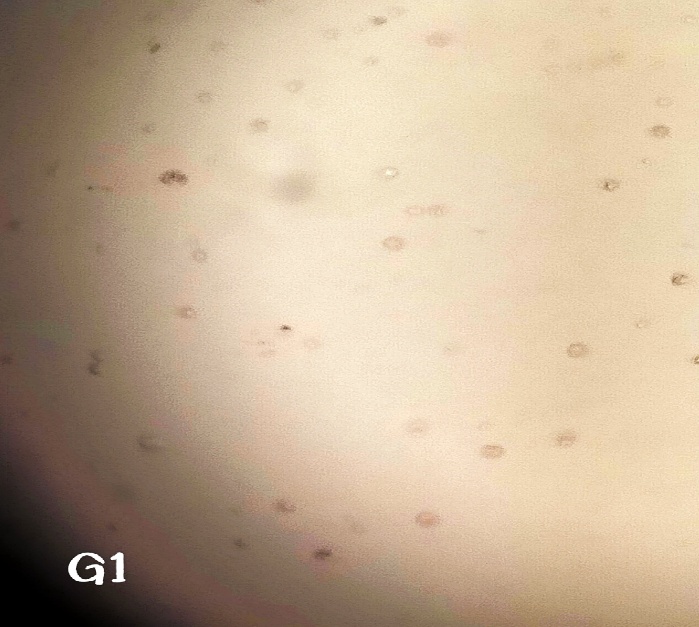
**


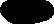

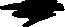


a) b)

**
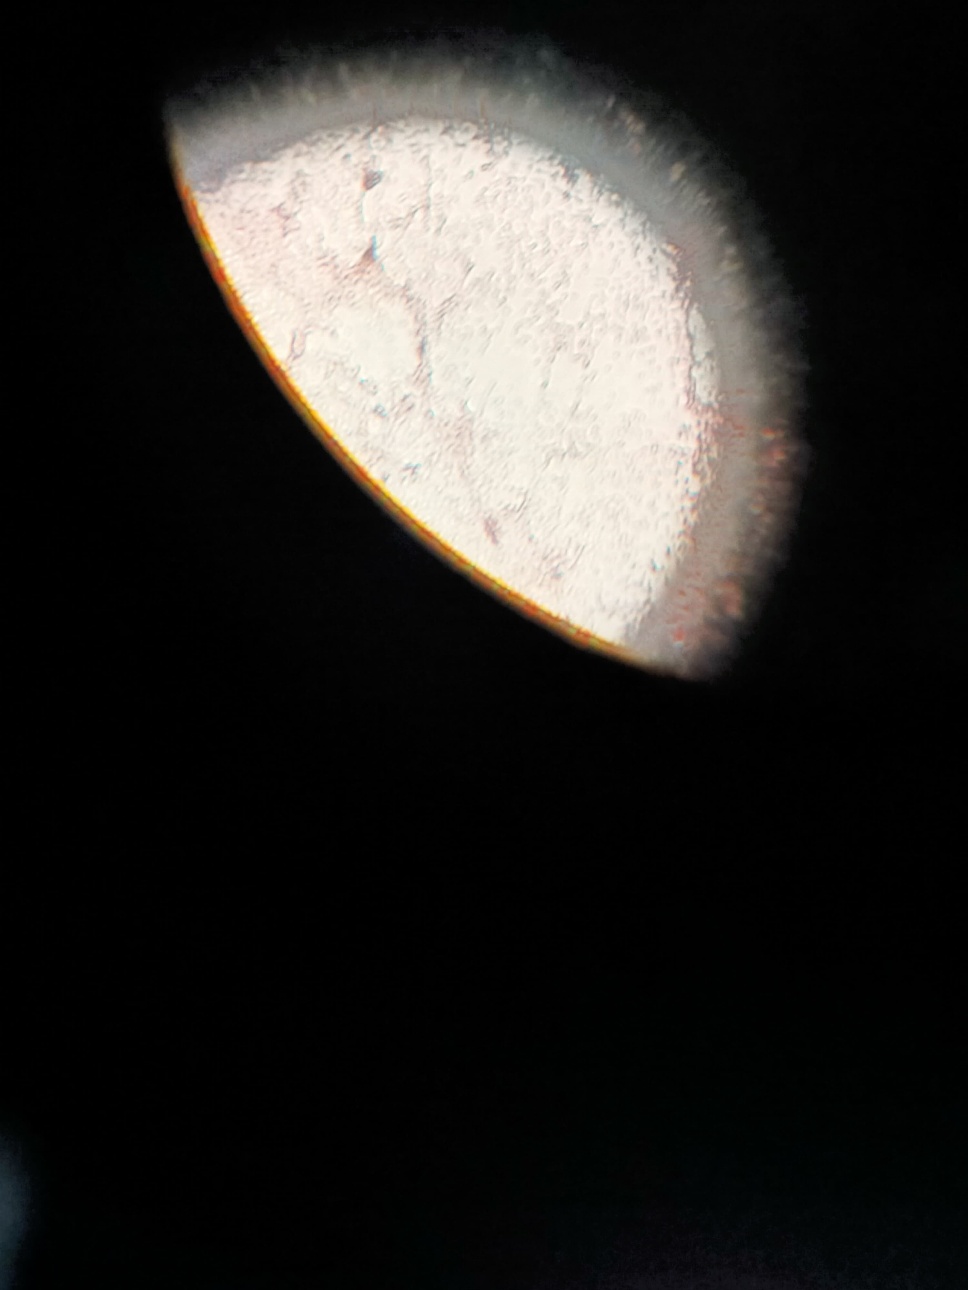

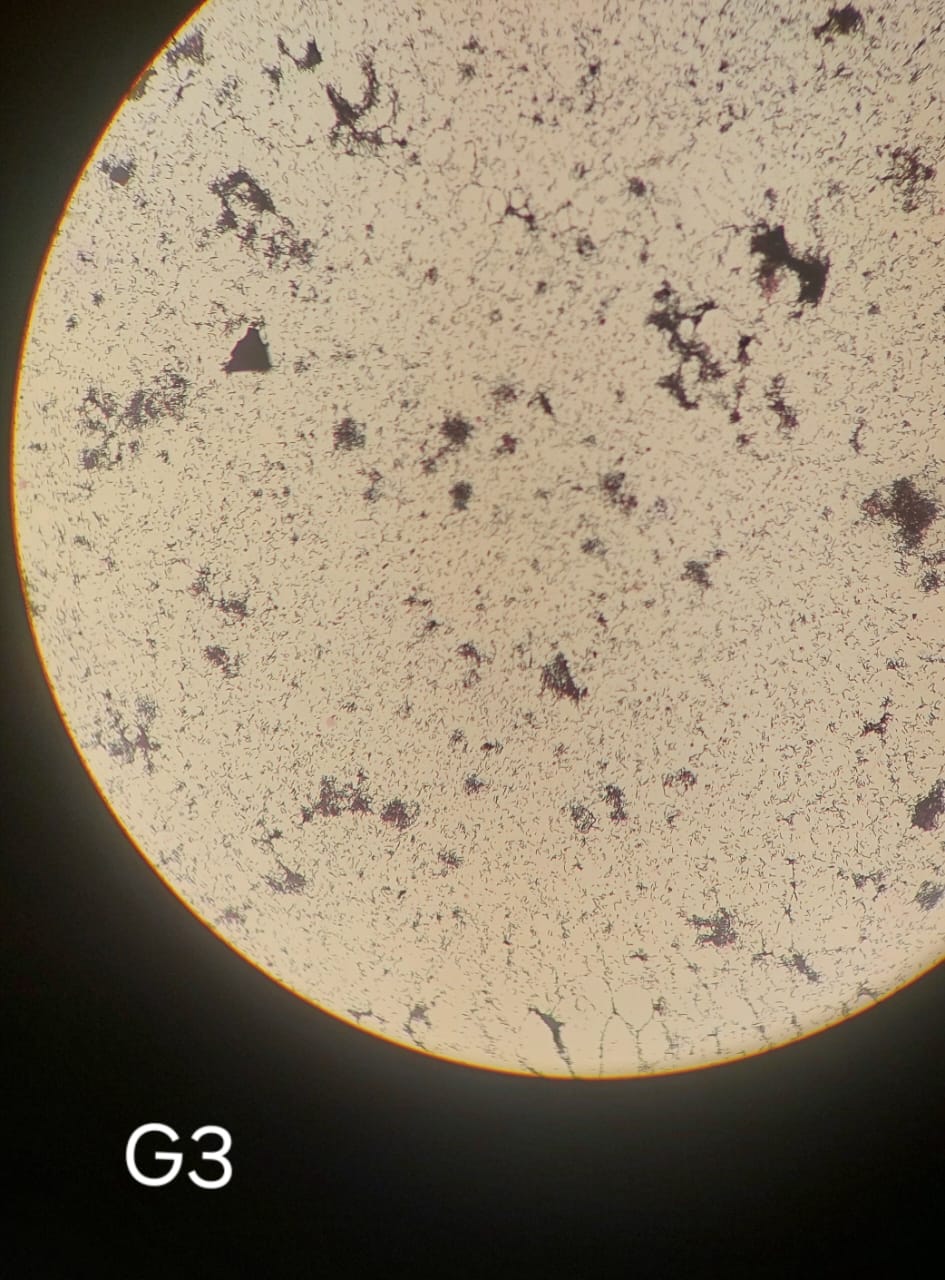
**


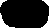


c) d)

**
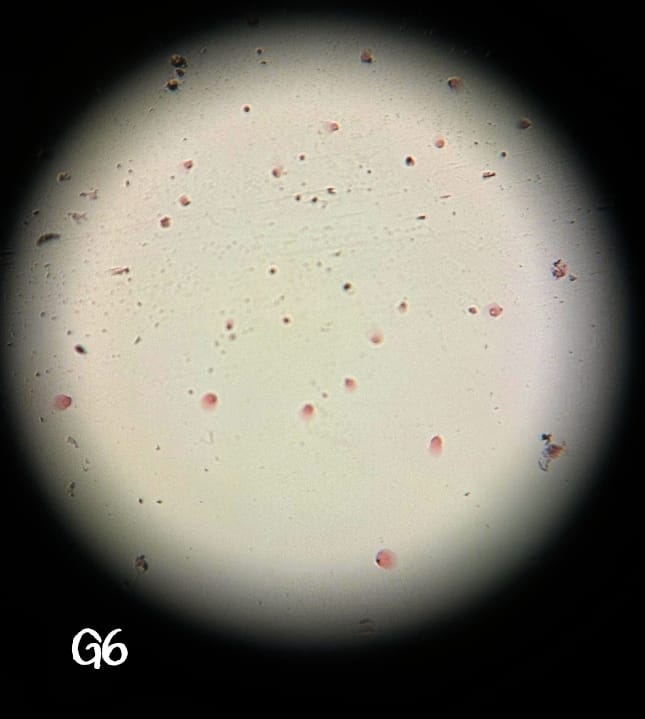

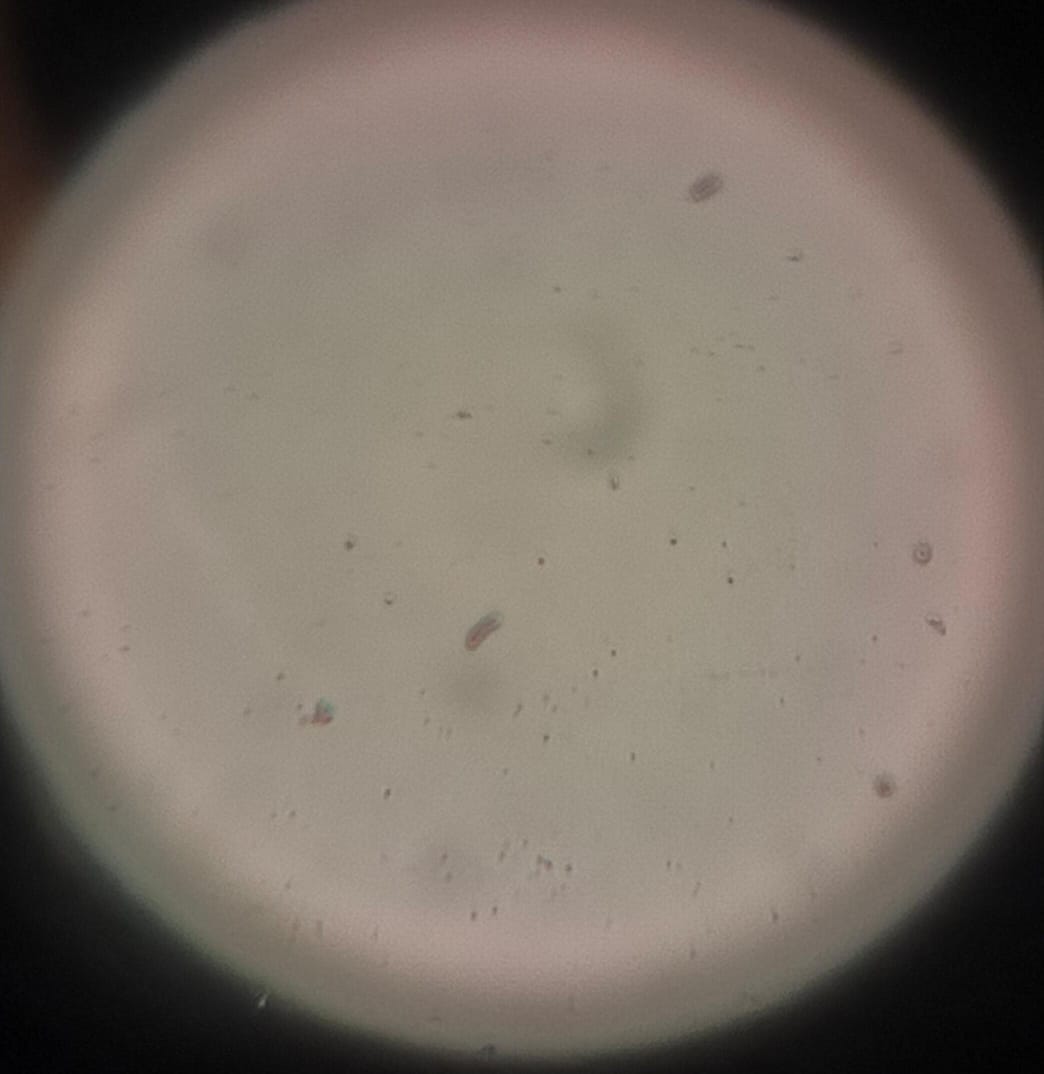
**


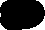


e) f)

**Fig.4** Gram Staining of streak isolates a) Streak 1 b) Streak 2 c) Streak 3 d) Streak 4 e) Streak 5 f) Streak 6


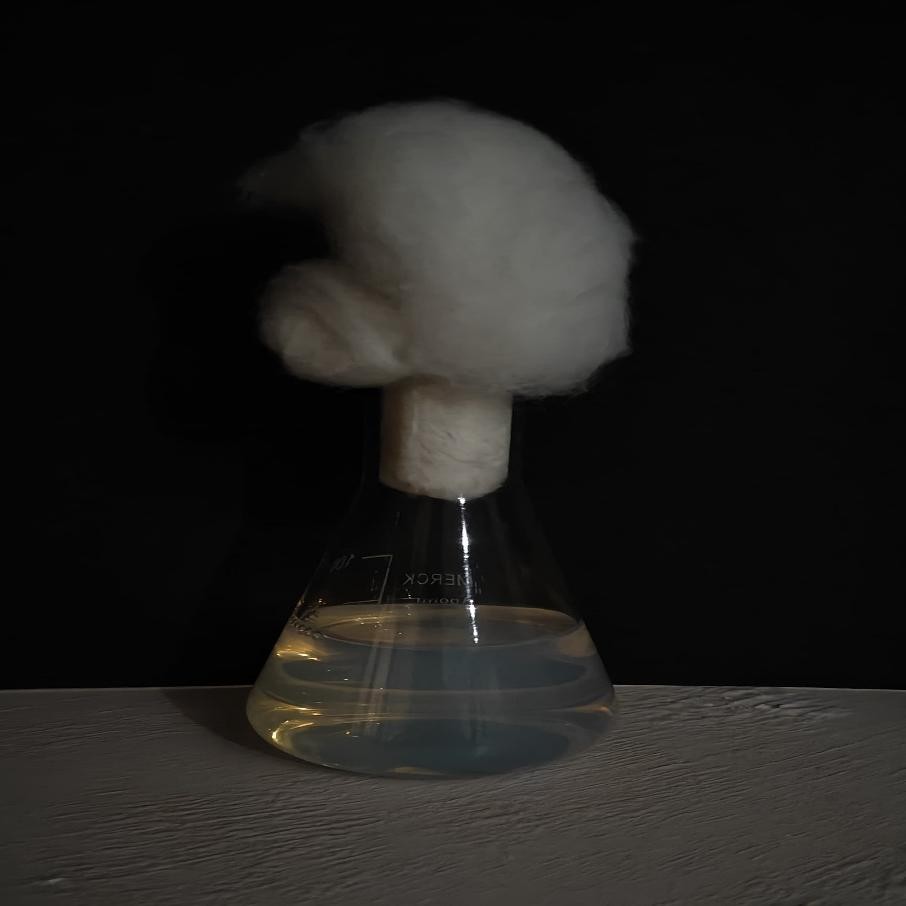


**Fig.5** Unpurified Silver Nanoparticles solution


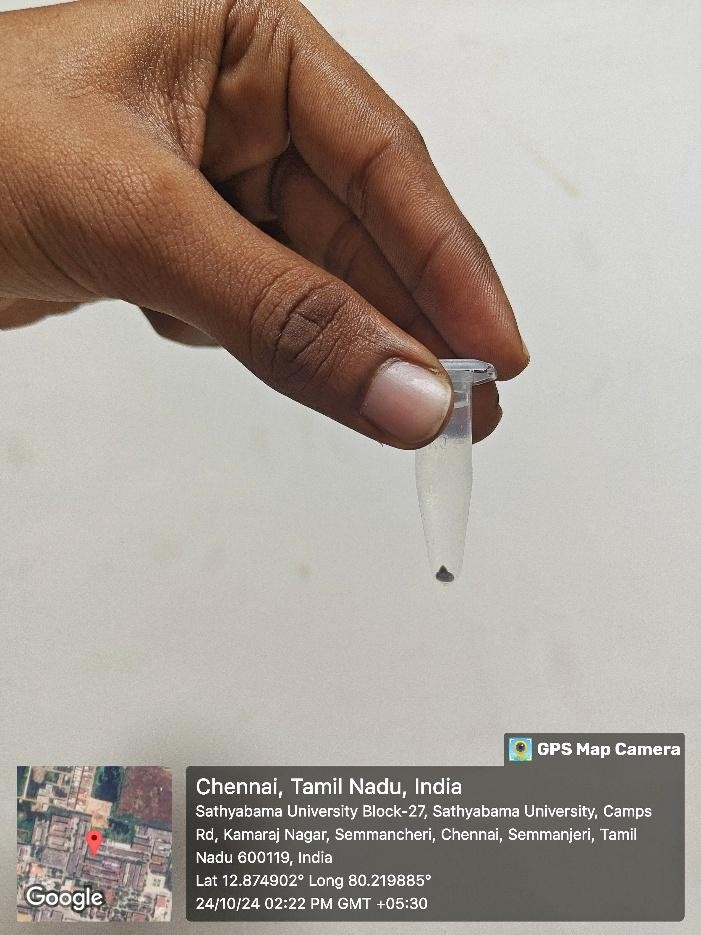


**Fig.6** Purified Silver Nanoparticles
